# Supplementary material for: Analysis of bonding motifs in unusual molecules I: planar hexacoordinated carbon atoms
Source: Royal Society of Chemistry journal article supplement (doi:10.1039/d4cp01800a), 2024-01-01
Supplement: d4cp01800a1.pdf [file d4cp01800a1.pdf]

Supplementary information for: Analysis of Bonding Motifs in Unusual  
Molecules I: Planar Hexacoordinated Carbon Atoms

Daniel Del Angel Cruz<sup>1</sup>, Katherine N. Ferreras<sup>1</sup>, Taylor Harville<sup>1</sup>, George  
Schoendorff<sup>2</sup> and Mark S. Gordon<sup>1\*</sup>

<sup>1</sup>Department of Chemistry and Ames National Laboratory, Iowa State  
University, Ames, Iowa, 50011, United States

<sup>2</sup>Department of Chemistry, University of South Dakota, Vermillion, South  
Dakota, 57069, United States

### S1 Geometries

Qualitatively, the RHF/6-31G(d), MP2/ACCD and CCSD(T)/ACCT geometries are similar. The computed CH<sub>3</sub>Li geometry is in good agreement with the one previously reported by Kauffman and collaborators,<sup>1</sup> at the MP2/6-31G(d) level of theory. For CO<sub>3</sub>Li<sub>3</sub><sup>+</sup>, the parameters reported by Wu and collaborators<sup>2</sup> at the CCSD(T)/ACCT level of theory are in good agreement with the present results. For CS<sub>3</sub>Li<sub>3</sub><sup>+</sup>, the PBE0-D3/def2-TZVP optimized geometry reported by Leyva-Parra and collaborators<sup>3</sup> predicts C-Li and Li-S bond distances that are too short relative to those predicted by the wave function methods.

A shortening of the C-Li distances is observed in the CCSD(T)/ACCT structures of CH<sub>3</sub>Li and CS<sub>3</sub>Li<sub>3</sub><sup>+</sup>, relative to their RHF/6-31G(d) counterparts. Generally, the treatment of electron correlation leads to longer interatomic equilibrium distances, as a result of the introduction of antibonding character into the wave function. However, a shortening may indicate that the CCSD(T) level of theory provides a better description of an attractive interaction that plays a significant role in the bonding of a molecule (e.g., ionic attraction), as it is the case in CH<sub>3</sub>Li, in which the C-Li bond is known to have a strong ionic character.<sup>4</sup> The observation of this shortening in CS<sub>3</sub>Li<sub>3</sub><sup>+</sup> but not in CO<sub>3</sub>Li<sub>3</sub><sup>+</sup>

would indicate the existence of ionic attraction in the former, but not in the latter, in accordance with previous reports.<sup>3</sup>

**Table S1** Computed  $\text{CH}_3\text{Li}$  ( $C_{3v}$ )  $\text{CO}_3\text{Li}_3^+$  ( $D_{3h}$ ) and  $\text{CS}_3\text{Li}_3^+$  ( $D_{3h}$ ) geometrical parameters.

| Parameter                                    | RHF/<br>6-31G(d) | MP2/ACCD | CCSD(T)/ACCT | Literature                                |
|----------------------------------------------|------------------|----------|--------------|-------------------------------------------|
| <b><math>\text{CH}_3\text{Li}</math></b>     |                  |          |              | <b>MP2/6-31G(d)<sup>1</sup></b>           |
| r(C-Li)                                      | 2.001            | 2.016    | 1.986        | 2.003                                     |
| r(C-H)                                       | 1.093            | 1.109    | 1.100        | 1.099                                     |
| $\angle$ H-C-Li                              | 112.60           | 112.62   | 112.79       | 112.0                                     |
| $\angle$ H-C-H                               | 106.17           | 106.15   | 105.96       | -                                         |
| <b><math>\text{CO}_3\text{Li}_3^+</math></b> |                  |          |              | <b>CCSD(T)/ACCT<sup>2</sup></b>           |
| r(C-O)                                       | 1.269            | 1.304    | 1.292        | 1.296                                     |
| r(C-Li)                                      | 2.204            | 2.237    | 2.212        | 2.212                                     |
| r(Li-O)                                      | 1.916            | 1.946    | 1.925        | 1.925                                     |
| <b><math>\text{CS}_3\text{Li}_3^+</math></b> |                  |          |              | <b>PBEO-D3/def2-<br/>TZVP<sup>3</sup></b> |
| r(C-S)                                       | 1.720            | 1.728    | 1.727        | 1.710                                     |
| r(C-Li)                                      | 2.770            | 2.770    | 2.722        | 2.670                                     |
| r(Li-S)                                      | 2.422            | 2.424    | 2.386        | 2.340                                     |

## S2 RHF/6-31G(d) QUAO results on the CCSD(T)/aug-cc-pVTZ geometries

RHF/6-31G(d) QUAOs were obtained at the CCSD(T)/aug-cc-pVTZ geometries of all three molecules in the study. For conciseness, the aug-cc-pVTZ basis set is abbreviated as ACCT. Qualitatively, all RHF/6-31G(d)//CCSD(T)/ACCT QUAOs match those presented in Figures 3 to 5 in the main body of this work. Thus, only the quantitative results are presented here. Bond orders (BOs) and kinetic bond orders (KBOs) are presented in Table S2, S5 and S7, for CH<sub>3</sub>Li, CO<sub>3</sub>Li<sub>3</sub><sup>+</sup> and CS<sub>3</sub>Li<sub>3</sub><sup>+</sup>, respectively. Orbital occupations and s and p characters are presented in Tables S3, S6 and S8 for CH<sub>3</sub>Li, CO<sub>3</sub>Li<sub>3</sub><sup>+</sup> and CS<sub>3</sub>Li<sub>3</sub><sup>+</sup>, respectively. Atomic charges computed from QUAO populations for all three molecules are presented in Table S4.

**Table S2** RHF/6-31G(d)//CCSD(T)/ACCT bonding interactions and characteristics in CH<sub>3</sub>Li. Only interactions with BO > 0.15 and KBO < -1 kcal/mol are listed.

| Bond         | Orbital I   | Orbital J    | BO   | KBO (kcal/mol) |
|--------------|-------------|--------------|------|----------------|
| CH $\sigma$  | Ch $\sigma$ | Hc $\sigma$  | 0.97 | -36.5          |
| CLi $\sigma$ | Cl $\sigma$ | Lic $\sigma$ | 0.75 | -10.6          |

**Table S3** RHF/6-31G(d)//CCSD(T)/ACCT orbital occupations and s- and p- character fractions in CH<sub>3</sub>Li.

| Orbital      | Occupation | Fraction s | Fraction p |
|--------------|------------|------------|------------|
| Ch $\sigma$  | 1.08       | 0.19       | 0.81       |
| Hc $\sigma$  | 0.89       | 1          | 0          |
| Cl $\sigma$  | 1.64       | 0.27       | 0.73       |
| Lic $\sigma$ | 0.36       | 0.81       | 0.19       |
| Lin $\nu$    | 0.02       | 0.09       | 0.91       |

**Table S4** RHF/6-31G(d)//CCSD(T)/ACCT atomic partial charges computed from QUAO populations in CH<sub>3</sub>Li, CO<sub>3</sub>Li<sup>+</sup> and CS<sub>3</sub>Li<sup>+</sup>.

| Molecule | CH <sub>3</sub> Li              |       |       | CO <sub>3</sub> Li <sup>+</sup> |       |       |
|----------|---------------------------------|-------|-------|---------------------------------|-------|-------|
| Atom     | C                               | H     | Li    | C                               | O     | Li    |
| Charge   | -0.89                           | +0.11 | +0.57 | +0.88                           | -0.68 | +0.71 |
| Molecule | CS <sub>3</sub> Li <sup>+</sup> |       |       |                                 |       |       |
| Atom     | C                               | S     | Li    |                                 |       |       |
| Charge   | -0.12                           | -0.12 | +0.49 |                                 |       |       |

**Table S5** RHF/6-31G(d)//CCSD(T)/ACCT bonding structures and characteristics in CO<sub>3</sub>Li<sup>+</sup>. Only interactions with BO larger than 0.15 and KBO lower than -1 kcal/mol are listed. The Li-C interactions are listed despite being below the set threshold.

| Bond                     | Orbital I   | Orbital J   | BO   | KBO   |
|--------------------------|-------------|-------------|------|-------|
| CO $\sigma$              | Co $\sigma$ | Oc $\sigma$ | 0.93 | -66.2 |
| CO $\pi$                 | Co $\pi$    | Oc $\pi$    | 0.54 | -13.9 |
| OO $\pi$                 | Oc $\pi$    | Oc $\pi$    | 0.23 | -2.9  |
| <i>Opl</i> -Co $\sigma$  | <i>Opl</i>  | Co $\sigma$ | 0.19 | -2.9  |
| <i>Opl</i> -Li $\sigma$  | <i>Opl</i>  | Li $\sigma$ | 0.43 | -12.5 |
| Oc $\pi$ -Li $\pi$       | Oc $\pi$    | Li $\pi$    | 0.16 | -1.5  |
| Li $\sigma$ -Co $\sigma$ | Li $\sigma$ | Co $\sigma$ | 0.05 | -0.6  |
| Li $\pi$ -Co $\pi$       | Li $\sigma$ | Co $\pi$    | 0.11 | -0.3  |

**Table S6** RHF/6-31G(d)//CCSD(T)/ACCT orbital occupations and s- and p- character fractions in CO<sub>3</sub>Li<sup>+</sup>.

| Orbital     | Occupation | Fraction s | Fraction p |
|-------------|------------|------------|------------|
| Co $\sigma$ | 0.81       | 0.29       | 0.71       |
| Co $\pi$    | 0.68       | 0.00       | 1.00       |
| Oc $\sigma$ | 1.23       | 0.26       | 0.74       |
| Oc $\pi$    | 1.74       | 0.00       | 1.00       |
| <i>Opl</i>  | 1.85       | 0.34       | 0.66       |
| Li $\sigma$ | 0.12       | 0.29       | 0.71       |
| Li $\pi$    | 0.04       | 0.00       | 1.00       |
| Lin $\nu$   | 0.01       | 0.36       | 0.64       |

**Table S7** RHF/6-31G(d)//CCSD(T)/ACCT bonding structures and characteristics in  $\text{CS}_3\text{Li}_3^+$ . Only interactions with BO larger than 0.15 and KBO lower than -1 kcal/mol are listed. The Li-C interactions are listed despite being below the set threshold.

| Bond                               | Orbital I          | Orbital J          | BO   | KBO (kcal/mol) |
|------------------------------------|--------------------|--------------------|------|----------------|
| $\text{CS}\sigma$                  | $\text{Cs}\sigma$  | $\text{Sc}\sigma$  | 0.96 | -40.4          |
| $\text{CS}\pi$                     | $\text{Cs}\pi$     | $\text{Sc}\pi$     | 0.54 | -9.1           |
| $\text{Ss}\pi$                     | $\text{Sc}\pi$     | $\text{Sc}\pi$     | 0.25 | -1.8           |
| $\text{Spl-Lis}\sigma$             | $\text{Spl}$       | $\text{Lis}\sigma$ | 0.59 | -16.7          |
| $\text{Sc}\pi\text{-Lis}\pi$       | $\text{Sc}\pi$     | $\text{Lis}\pi$    | 0.21 | -1.9           |
| $\text{Lis}\sigma\text{-Cs}\sigma$ | $\text{Lis}\sigma$ | $\text{Cs}\sigma$  | 0.04 | -0.2           |
| $\text{Lis}\pi\text{-Cs}\pi$       | $\text{Lis}\pi$    | $\text{Cs}\pi$     | 0.14 | -0.2           |

The RHF/6-31G(d)//CCSD(T)/aug-cc-pVTZ results are essentially the same as the RHF/6-31G(d) ones. Thus, the RHF results are used in the main body of the paper.

### S3 Empty orbitals on Li

The orbitals displayed in this section correspond to the RHF/6-31G(d) results reported in the main body of this work. The following orbitals do not participate in any bonding interaction, and thus have been excluded from the figures in the main text.

### S3.1 $\text{CH}_3\text{Li}$

#### Li empty orbital

$L_{inv}$   
0.02

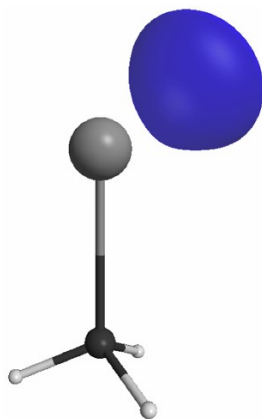

**Figure S1** Empty orbital on Li in  $\text{CH}_3\text{Li}$ . The orbital population is shown below the orbital label.

### S3.2 $\text{CO}_3\text{Li}_3^+$

#### Li empty orbital

$L_{inv}$   
0.01

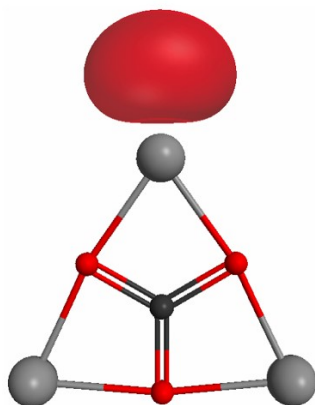

**Figure S2** Empty orbital on Li in  $\text{CO}_3\text{Li}_3^+$ . The orbital population is shown below the orbital label.

### S3.3 $CS_3Li_3^+$

#### Li empty orbital

$Li_{inv}$   
0.02

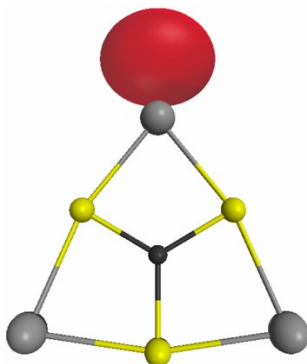

**Figure S3** Empty orbital on Li in  $CS_3Li_3^+$ . The orbital population is shown below the orbital label.

#### **S4 Comparison of the QUAOs of $CH_3Li$ obtained from RHF/6-31G(d) and full-valence (8,11)-CASSCF/6-311++G(d,p)//RHF/6-311++G(d,p) wave functions**

The CASSCF calculation was ran using the RHF occupied molecular orbitals (MOs) + valence virtual orbitals (VVOs) as starting point. The active space was chosen to be the full valence space; 8 valence electrons in 11 valence orbitals (considering the three 2p orbitals on Li).

The QUAOs are shown in Figures 1, 2, and 3. Bond orders (BOs) are shown in bold above the plotted orbitals. Kinetic bond orders (KBOs) (in kcal/mol) are shown to the right of the respective BO. Bonding interactions, s- and p- characters and partial charges are summarized in Tables 1 to 3. It is evident that the results do not change significantly with respect to the RHF results when a CASSCF wave function is employed.

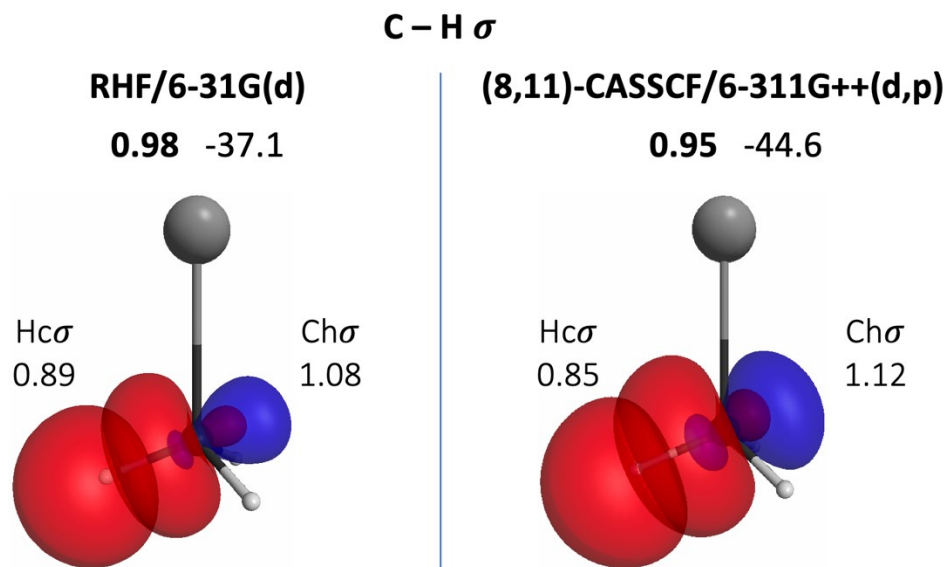

**Figure 1** RHF vs CASSCF CH $\sigma$  interaction in CH<sub>3</sub>Li. Bond orders are shown in bold above the displayed orbitals. Kinetic bond orders (in kcal/mol) are shown to the right of the corresponding bond order. The labels of the orbitals involved in the interactions are shown to the sides of the displayed orbitals, and orbital populations are shown below the corresponding orbital label.

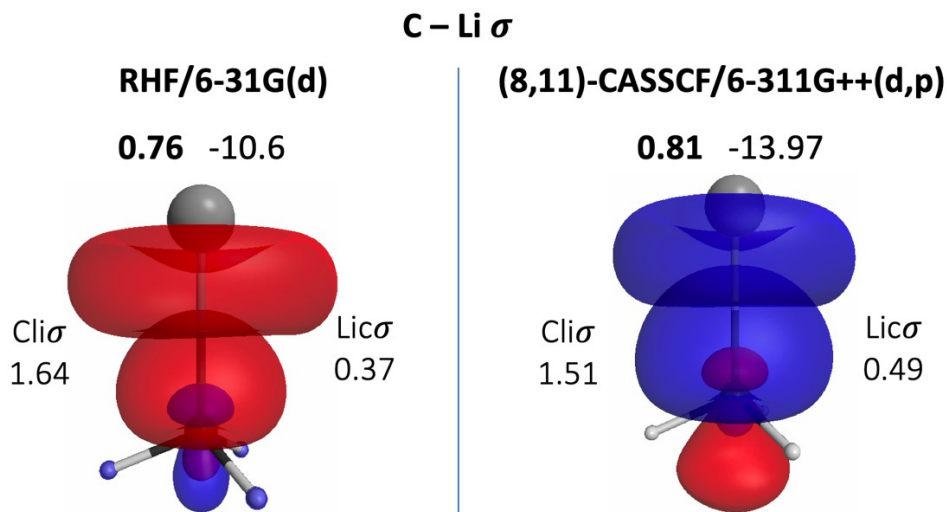

**Figure 2** RHF vs CASSCF CLi $\sigma$  interaction in CH<sub>3</sub>Li. Bond orders are shown in bold above the displayed orbitals. Kinetic bond orders (in kcal/mol) are shown to the right of the corresponding bond order. The labels of the orbitals involved in the interactions are shown to the sides of the displayed orbitals, and orbital populations are shown below the corresponding orbital label.



### Li empty orbital

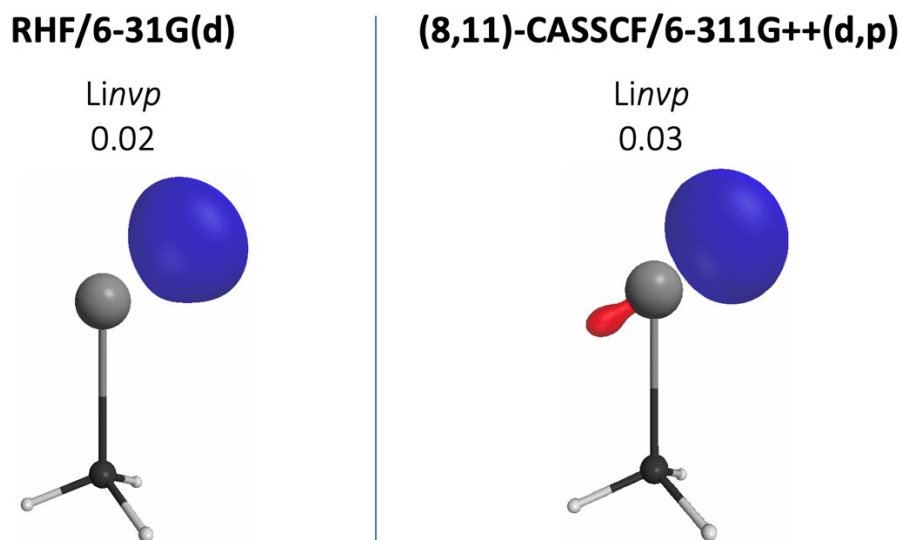

**Figure 3** RHF vs CASSCF Li empty orbital in CH<sub>3</sub>Li. The labels of the orbitals are shown above the displayed orbitals, and orbital populations are shown below the corresponding orbital label.

**Table 1** comparison of the bonding interactions and characteristics in CH<sub>3</sub>Li. Only interactions with BO > 0.15 and KBO < -1 kcal/mol are listed.

| Bond         | Orbital I   | Orbital J    | RHF/6-31G(d) |       | (8,11)-CASSCF/6-311++G(d,p) |       |
|--------------|-------------|--------------|--------------|-------|-----------------------------|-------|
|              |             |              | BO           | KBO   | BO                          | KBO   |
| CH $\sigma$  | Ch $\sigma$ | Hc $\sigma$  | 0.98         | -37.1 | 0.95                        | -44.6 |
| CLi $\sigma$ | Cl $\sigma$ | Lic $\sigma$ | 0.76         | -10.6 | 0.81                        | -14.0 |

**Table 2** Comparison of the orbital occupations and s- and p- character fractions in CH<sub>3</sub>Li.

| Orbital      | RHF/6-31G(d) |            |            | (8,11)-CASSCF/6-311++G(d,p) |            |            |
|--------------|--------------|------------|------------|-----------------------------|------------|------------|
|              | Occupation   | Fraction s | Fraction p | Occupation                  | Fraction s | Fraction p |
| Ch $\sigma$  | 1.08         | 0.19       | 0.81       | 1.12                        | 0.19       | 0.81       |
| Hc $\sigma$  | 0.89         | 1          | 0          | 0.85                        | 1.00       | 0.00       |
| Cl $\sigma$  | 1.64         | 0.26       | 0.74       | 1.51                        | 0.25       | 0.75       |
| Lic $\sigma$ | 0.37         | 0.81       | 0.19       | 0.49                        | 0.86       | 0.14       |
| Linv         | 0.02         | 0.09       | 0.91       | 0.03                        | 0.07       | 0.93       |

**Table 3** Comparison of the atomic partial charges computed from QUAO populations in CH<sub>3</sub>Li.

|        | RHF/6-31G(d) |       |       | (8,11)-CASSCF/6-311++G(d,p) |       |       |
|--------|--------------|-------|-------|-----------------------------|-------|-------|
| Atom   | C            | H     | Li    | C                           | H     | Li    |
| Charge | -0.89        | +0.11 | +0.56 | -0.88                       | +0.15 | +0.43 |

## References

- 1E. Kaufmann, K. Raghavachari, A. E. Reed and P. V. R. Schleyer, Methyl lithium and its oligomers. Structural and energetic relationships, *Organometallics*, 1988, **7**, 1597–1607.
- 2Y.-B. Wu, Y. Duan, G. Lu, H.-G. Lu, P. Yang, P. von R. Schleyer, G. Merino, R. Islas and Z.-X. Wang, D<sub>3h</sub> CN<sub>3</sub>Be<sub>3</sub><sup>+</sup> and CO<sub>3</sub>Li<sub>3</sub><sup>+</sup>: viable planar hexacoordinate carbon prototypes, *Phys. Chem. Chem. Phys.*, 2012, **14**, 14760.
- 3L. Leyva-Parra, L. Diego, O. Yañez, D. Inostroza, J. Barroso, A. Vásquez-Espinal, G. Merino and W. Tiznado, Planar Hexacoordinate Carbons: Half Covalent, Half Ionic, *Angew. Chem. Int. Ed.*, 2021, **60**, 8700–8704.
- 4F. M. Bickelhaupt, M. Solà and C. Fonseca Guerra, Covalency in Highly Polar Bonds. Structure and Bonding of Methylalkalimetal Oligomers (CH<sub>3</sub>M)<sub>n</sub> (M = Li–Rb; n = 1, 4), *J. Chem. Theory Comput.*, 2006, **2**, 965–980.
